# Supplementary material for: Imatinib dose reduction in major molecular response of chronic myeloid leukemia: results from the German Chronic Myeloid Leukemia-Study IV
Source: PubMed Central journal article supplement — Haematologica. 2018 Dec 4;104(5):955–62. doi: 10.3324/haematol.2018.206797 (PMC6518910; doi:10.3324/haematol.2018.206797), 2019-05
Supplement: 2018.206797.MICHEL_SUPPL.pdf [file 2018.206797.MICHEL_SUPPL.pdf]

# Imatinib dose reduction in major molecular response of chronic myeloid leukemia: results from the German Chronic Myeloid Leukemia-Study IV

Christian Michel,<sup>1\*</sup> Andreas Burchert,<sup>1,\*</sup> Andreas Hochhaus,<sup>2</sup> Susanne Saussele,<sup>3</sup> Andreas Neubauer,<sup>1</sup> Michael Lauseker,<sup>4</sup> Stefan W. Krause,<sup>5</sup> Hans-Jochem Kolb,<sup>6</sup> Dieter Kurt Hossfeld,<sup>7</sup> Christoph Nerl,<sup>8</sup> Gabriela M. Baerlocher,<sup>9</sup> Dominik Heim,<sup>10</sup> Tim H Brümmendorf,<sup>11</sup> Alice Fabarius,<sup>3</sup> Claudia Haferlach,<sup>12</sup> Brigitte Schlegelberger,<sup>13</sup> Leopold Balleisen,<sup>14</sup> Maria-Elisabeth Goebeler,<sup>15</sup> Mathias Hänel,<sup>16</sup> Anthony Ho,<sup>17</sup> Jolanta Dengler,<sup>18</sup> Christiane Falge,<sup>19</sup> Robert Möhle,<sup>20</sup> Stephan Kremers,<sup>21</sup> Michael Kneba,<sup>22</sup> Frank Stegelmann,<sup>23</sup> Claus-Henning Köhne,<sup>24</sup> Hans-Walter Lindemann,<sup>25</sup> Cornelius F. Waller,<sup>26</sup> Karsten Spiekermann,<sup>6</sup> Wolfgang E. Berdel,<sup>27</sup> Lothar Müller,<sup>28</sup> Matthias Edinger,<sup>29</sup> Jiri Mayer,<sup>30</sup> Dietrich W. Beelen,<sup>31</sup> Martin Bentz,<sup>32</sup> Hartmut Link,<sup>33</sup> Bernd Hertenstein,<sup>34</sup> Roland Fuchs,<sup>11</sup> Martin Wernli,<sup>35</sup> Frank Schlegel,<sup>36</sup> Rudolf Schlag,<sup>37</sup> Maïke de Wit,<sup>38</sup> Lorenz Trümper,<sup>39</sup> Holger Hebart,<sup>40</sup> Markus Hahn,<sup>41</sup> Jörg Thomalla,<sup>42</sup> Christof Scheid,<sup>43</sup> Philippe Schafhausen,<sup>7</sup> Walter Verbeek,<sup>44</sup> Michael J. Eckart,<sup>45</sup> Winfried Gassmann,<sup>46</sup> Michael Schenk,<sup>47</sup> Peter Brossart,<sup>48</sup> Thomas Wündisch,<sup>1</sup> Thomas Geer,<sup>49</sup> Stephan Bildat,<sup>50</sup> Erhardt Schäfer,<sup>51</sup> Joerg Hasford,<sup>4</sup> Rüdiger Hehlmann<sup>3</sup> and Markus Pfirrmann<sup>4</sup>

<sup>1</sup>Universitätsklinikum Gießen und Marburg, Campus Marburg, Klinik für Hämatologie, Onkologie und Immunologie, Philipps Universität Marburg, Germany; <sup>2</sup>Klinik für Innere Medizin II, Hämatologie und Internistische Onkologie, Jena, Germany; <sup>3</sup>III. Medizinische Klinik, Medizinische Fakultät Mannheim, University Heidelberg, Mannheim, Germany; <sup>4</sup>Institut für Medizinische Informationsverarbeitung, Biometrie und Epidemiologie, Ludwig-Maximilians-Universität München, Munich, Germany; <sup>5</sup>Medizinische Klinik 5, Universitätsklinikum, Erlangen, Germany; <sup>6</sup>Medizinische Klinik III, Universität München, Germany; <sup>7</sup>Medizinische Klinik, Universitätsklinikum Eppendorf, Hamburg, Germany; <sup>8</sup>Klinikum Schwabing, Munich, Germany; <sup>9</sup>Inselspital, Bern, Switzerland; <sup>10</sup>Universitätsspital, Basel, Switzerland; <sup>11</sup>RWTH, Aachen, Germany; <sup>12</sup>MLL, Munich, Germany; <sup>13</sup>Institut für Humangenetik, MHH, Hannover, Germany; <sup>14</sup>Ev. Krankenhaus, Hamm, Germany; <sup>15</sup>Comprehensive Cancer Center Mainfranken und Medizinische Klinik II, Zentrum für Innere Medizin, Würzburg, Germany; <sup>16</sup>Klinik für Innere Medizin 3, Chemnitz, Germany; <sup>17</sup>Medizinische Klinik V, Universität Heidelberg, Germany; <sup>18</sup>Onkologische Schwerpunktpraxis, Heilbronn, Germany; <sup>19</sup>Medizinische Klinik 5, Klinikum Nürnberg-Nord, Germany; <sup>20</sup>Medizinische Abteilung 2, Universitätsklinikum, Tübingen, Germany; <sup>21</sup>Caritas Krankenhaus, Lebach, Germany; <sup>22</sup>Medizinische Klinik und Poliklinik, Universitätsklinikum Schleswig-Holstein, Kiel, Germany; <sup>23</sup>Klinik für Innere Medizin 3, Universitätsklinikum, Ulm, Germany; <sup>24</sup>Universitätsklinik für Onkologie und Hämatologie, Oldenburg, Germany; <sup>25</sup>St Marien-Hospital, Hagen, Germany; <sup>26</sup>Innere Medizin 1, Universitätsklinikum, Freiburg, Germany; <sup>27</sup>Medizinische Klinik A, Universitätsklinikum, Münster, Germany; <sup>28</sup>Onkologie Leer Unter Ems, Leer, Germany; <sup>29</sup>Klinik und Poliklinik für Innere Medizin 3, Universitätsklinikum, Regensburg, Germany; <sup>30</sup>Masaryk University Hospital, Brno, Czech Republic; <sup>31</sup>Klinik für Knochenmarktransplantation, Essen, Germany; <sup>32</sup>Medizinische Klinik 3, Städtisches Klinikum, Karlsruhe, Germany; <sup>33</sup>Hematology, Medical Oncology, Kaiserslautern, Germany; <sup>34</sup>1. Medizinische Klinik, Klinikum Bremen Mitte, Bremen, Germany; <sup>35</sup>Kantonsspital, Aarau, Switzerland; <sup>36</sup>St Antonius-Hospital, Eschweiler, Germany; <sup>37</sup>Hämatologische-Onkologische Schwerpunktpraxis, Würzburg, Germany; <sup>38</sup>Klinik für Innere Medizin II, Hämatologie, Onkologie und Palliativmedizin, Vivantes Klinikum Neukölln, Berlin, Germany; <sup>39</sup>Klinik für Hämatologie und medizinische Onkologie, Universitätsmedizin, Göttingen, Germany; <sup>40</sup>Stauferklinikum Schwäbisch Gmünd, Mutlangen, Germany; <sup>41</sup>Onkologie Zentrum, Ansbach, Germany; <sup>42</sup>PraxisKlinik für Hämatologie und Onkologie, Koblenz, Germany; <sup>43</sup>Klinik 1 für Innere Medizin, Universitätsklinikum, Köln, Germany; <sup>44</sup>Ambulante Hämatologie und Onkologie, Bonn, Germany; <sup>45</sup>Internistische Schwerpunktpraxis, Erlangen, Germany; <sup>46</sup>St Marien-Krankenhaus, Siegen, Germany; <sup>47</sup>Barmherzige Brüder, Regensburg, Germany; <sup>48</sup>Medizinische Klinik 3, Universität, Bonn, Germany; <sup>49</sup>Diakonie, Schwäbisch Hall, Germany; <sup>50</sup>Medizinische Klinik 2, Herford, Germany and <sup>51</sup>Onkologische Schwerpunktpraxis, Bielefeld, Germany

\*CM and AB contributed equally to this work.

©2019 Ferrata Storti Foundation. This is an open-access paper. doi:10.3324/haematol.2018.206797

Received: September 23, 2018.

Accepted: November 22, 2018.

Pre-published: December 4, 2018.

Correspondence: ANDREAS BURCHERT [burchert@staff.uni-marburg.de](mailto:burchert@staff.uni-marburg.de)

## Supplementary material

### Molecular analyses

Molecular diagnostics for residual BCR-ABL transcripts followed the procedures and definitions of Hughes et al. <sup>1</sup> and Cross et al. <sup>2</sup> and were performed in two standardized and accredited laboratories with defined conversion factors for equivalence of tests (Mannheim and MLL Munich) <sup>3</sup>.

The analysis of molecular end points was restricted to patients expressing b2a2 and/or b3a2 transcripts. MMR, MR<sup>4</sup> and MR<sup>4.5</sup> were defined as previously described <sup>2, 4</sup>.

To be considered for this analysis, in accordance with its meaning for later deep MR, the last molecular response in the high-dose treatment interval before reduction to 400 mg/day had to be at least MMR. Results of molecular samples taken within one month after stopping high-dose treatment were still attributed to the high-dose therapy. Molecular diagnostics dating from one month after start of reduced imatinib therapy with 400 mg/day to 14 days after end of reduced therapy were rated as results linkable to the reduction period. This fortnight was not considered, if end of reduction therapy meant the restart of 600 or 800 mg/day or start of a second-generation TKI. Treatment breaks within the reduction period of not more than six weeks were acceptable and not particularly considered. In contrast, treatment breaks of more than six weeks were not regarded as a part of the reduced-treatment interval. In this situation, only the first period with reduced therapy was evaluated with regard to continued molecular response.

**Supplementary Table 1.** Characteristics of the 68 patients included in the study

| <b>Characteristic, unit</b>                  | <b>Median (range)<br/>or n (%)</b> | <b>Mean<br/>(standard deviation)</b> |
|----------------------------------------------|------------------------------------|--------------------------------------|
| <b>Variables recorded at diagnosis</b>       |                                    |                                      |
| Age (years)                                  | 52 (20-81)                         | 50 (13)                              |
| Sex (number and proportion of males)         | 48 (71%)                           |                                      |
| Spleen size cm below costal margin (cm)      | 2 (0-18)                           | 3 (4)                                |
| White blood cell count (x10 <sup>9</sup> /L) | 74 (3-497)                         | 111 (111)                            |
| Blasts in peripheral blood (%)               | 0 (0-12)                           | 2 (2)                                |
| Eosinophils in peripheral blood (%)          | 2 (0-16)                           | 3 (3)                                |
| Basophils in peripheral blood (%)            | 3 (0-19)                           | 4 (4)                                |
| Platelet count (x10 <sup>9</sup> /L)         | 358 (123-1535)                     | 417 (247)                            |
| <b>Sokal score</b>                           |                                    |                                      |
| Low risk                                     | 29 (43%)                           |                                      |
| Intermediate risk                            | 27 (40%)                           |                                      |
| High risk                                    | 12 (18%)                           |                                      |
| <b>Euro score</b>                            |                                    |                                      |
| Low risk                                     | 30 (44%)                           |                                      |
| Intermediate risk                            | 34 (50%)                           |                                      |
| High risk                                    | 4 (6%)                             |                                      |
| <b>EUTOS score</b>                           |                                    |                                      |
| Low risk                                     | 62 (91%)                           |                                      |
| High risk                                    | 6 (9%)                             |                                      |
| <b>ELTS Score</b>                            |                                    |                                      |
| Low risk                                     | 44 (65%)                           |                                      |
| Intermediate risk                            | 19 (28%)                           |                                      |
| High risk                                    | 5 (7%)                             |                                      |

| <b>Variables recorded under treatment</b>  |           |         |
|--------------------------------------------|-----------|---------|
| Time with 800mg dosage, months             | 31 (6-98) | 35 (20) |
| Time from start of 800mg until MMR, months | 5 (0-23)  | 7 (5)   |
| Time from MMR until end of 800mg, months   | 23 (0-93) | 28 (20) |
| Time with 400mg dosage, months             | 34 (6-78) | 32 (19) |

MMR=Major molecular remission.

**Supplementary Figure 1.** Probability of MR<sup>4</sup> relapse-free survival after dose reduction to imatinib at 400mg / day (n=43 pat., at least in MR<sup>4</sup>, at stop of high-dose treatment)

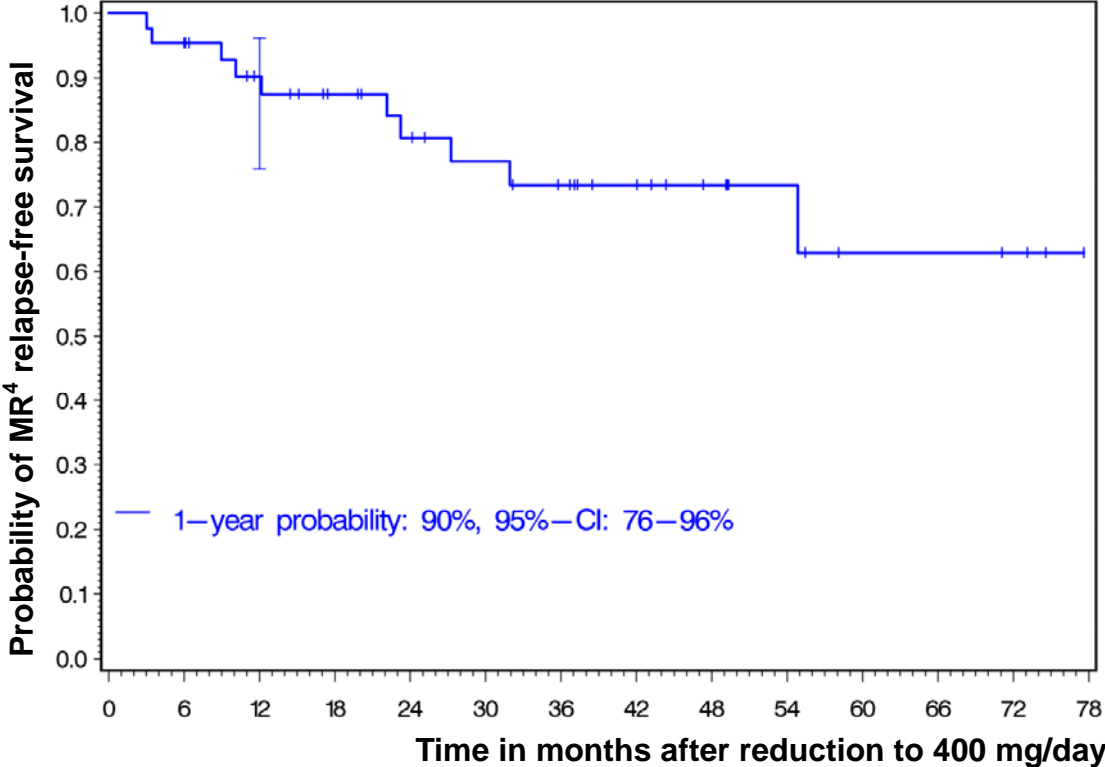

**Number of patients still at risk (n) at different months of observation**

| Months              | 0  | 12 | 24 | 36 | 48 | 60 | 72 | 78 |
|---------------------|----|----|----|----|----|----|----|----|
| Patients at risk, n | 43 | 33 | 24 | 18 | 10 | 4  | 3  | 0  |

1. Hughes T, Deininger M, Hochhaus A, et al. Monitoring CML patients responding to treatment with tyrosine kinase inhibitors: review and recommendations for harmonizing current methodology for detecting BCR-ABL transcripts and kinase domain mutations and for expressing results. *Blood*. 2006;108(1):28-37.
2. Cross NC, White HE, Muller MC, Saglio G, Hochhaus A. Standardized definitions of molecular response in chronic myeloid leukemia. *Leukemia*. 2012;26(10):2172-2175.
3. Muller MC, Cross NC, Erben P, et al. Harmonization of molecular monitoring of CML therapy in Europe. *Leukemia*. 2009;23(11):1957-1963.
4. Branford S, Fletcher L, Cross NC, et al. Desirable performance characteristics for BCR-ABL measurement on an international reporting scale to allow consistent interpretation of individual patient response and comparison of response rates between clinical trials. *Blood*. 2008;112(8):3330-3338.
