# Supplementary material for: Imatinib dose reduction in major molecular response of chronic myeloid leukemia: results from the German Chronic Myeloid Leukemia-Study IV
Source: PubMed Central journal article supplement — Haematologica. 2018 Dec 4;104(5):955–62. doi: 10.3324/haematol.2018.206797 (PMC6518910; doi:10.3324/haematol.2018.206797), 2019-05
Supplement: 2018_206797-Disclosures_and_Contributions.pdf [file 2018_206797-Disclosures_and_Contributions.pdf]

Haematologica  
HAEMATOL/2018/206797  
Version 3

Imatinib dose reduction in major molecular response of chronic myeloid leukemia: results from the German Chronic Myeloid Leukemia-Study IV.

Christian Michel, Andreas Burchert, Andreas Hochhaus, Susanne Saussele, Andreas Neubauer, Michael Lauseker, Stefan W. Krause, Hans-Jochem Kolb, Dieter Kurt Hossfeld, Christoph Nerl, Gabriela M. Baerlocher, Dominik Heim, Tim H Brümmendorf, Alice Fabarius, Claudia Haferlach, Brigitte Schlegelberger, Leopold Balleisen, Maria-Elisabeth Goebeler, Mathias Hänel, Anthony Ho, Jolanta Dengler, Christiane Falge, Robert Möhle, Stephan Kremers, Michael Kneba, Frank Stegelmann, Claus-Henning Köhne, Hans-Walter Lindemann, Cornelius F. Waller, Karsten Spiekermann, Wolfgang E. Berdel, Lothar Müller, Matthias Edinger, Jiri Mayer, Dietrich W. Beelen, Martin Bentz, Hartmut Link, Bernd Hertenstein, Roland Fuchs, Martin Wernli, Frank Schlegel, Rudolf Schlag, Maike de Wit, Lorenz Trümper, Holger Hebart, Markus Hahn, Jörg Thomalla, Christof Scheid, Philippe Schafhausen, Walter Verbeek, Michael J. Eckart, Winfried Gassmann, Michael Schenk, Peter Brossart, Thomas Wündisch, Thomas Geer, Stephan Bildat, Erhardt Schäfer, Joerg Hasford, Rüdiger Hehlmann, and Markus Pfirrmann

Disclosures: Andreas Hochhaus: Research Funding (Major): Novartis, BMS, Incyte and Pfizer; Honoraria and Travel support: Novartis, BMS, Incyte and Pfizer. Susanne Saussele: Research Funding (Major): Novartis and BMS. Honoraria from Speakers Bureau (Minor): Novartis, BMS, Incyte, Pfizer and Roche. Andreas Burchert: Research Funding (Major): AOP Orphan, Novartis; Honoraria: Novartis, BMS, Pfizer, AOP Orphan Christof Scheid: Honoraria and travel support from Novartis, BMS, Pfizer, Incyte Markus Pfirrmann: Honoraria: Novartis. Research Funding (Minor): BMS

Contributions: CM and AB contributed equally to this work. AB, CM and MP performed data analysis and wrote the paper. RH is principal investigator of the CML-Study IV. All other authors recruited patients for the study, critically discussed data and revised the manuscript.
